# Supplementary material
Source: PubMed Central journal article supplement (PMC7552816)

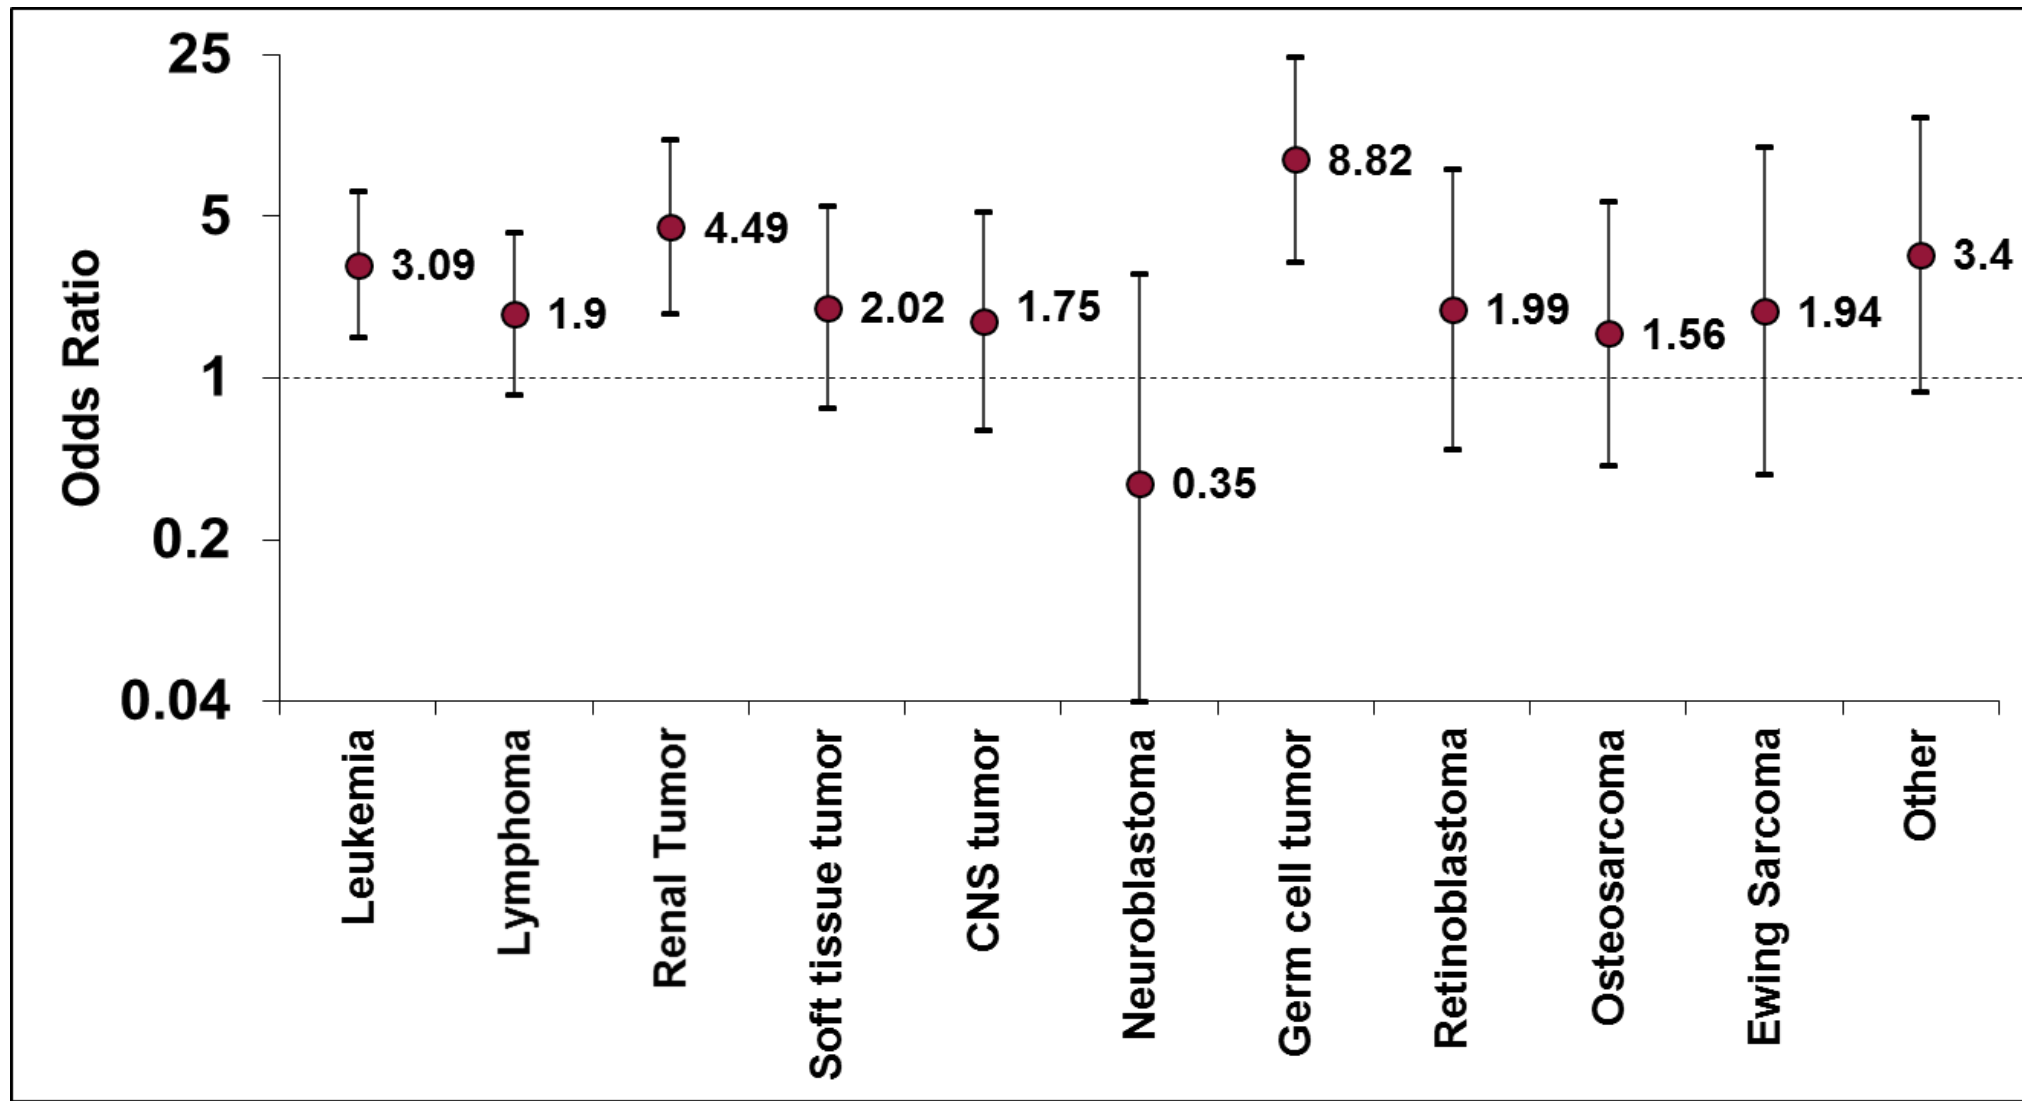

Supplement: NIHMS1605746-supplement-1.pdf [file NIHMS1605746-supplement-1.pdf]
